# Supplementary material for: A visually distinguishable light interfering bioresponsive silica nanoparticle hydrogel sensor fabricated through the molecular imprinting technique
Source: Royal Society of Chemistry journal article supplement (doi:10.1039/c9tb01579e), 2019-01-01
Supplement: c9tb01579e1.pdf [file c9tb01579e1.pdf]

### Supporting Information

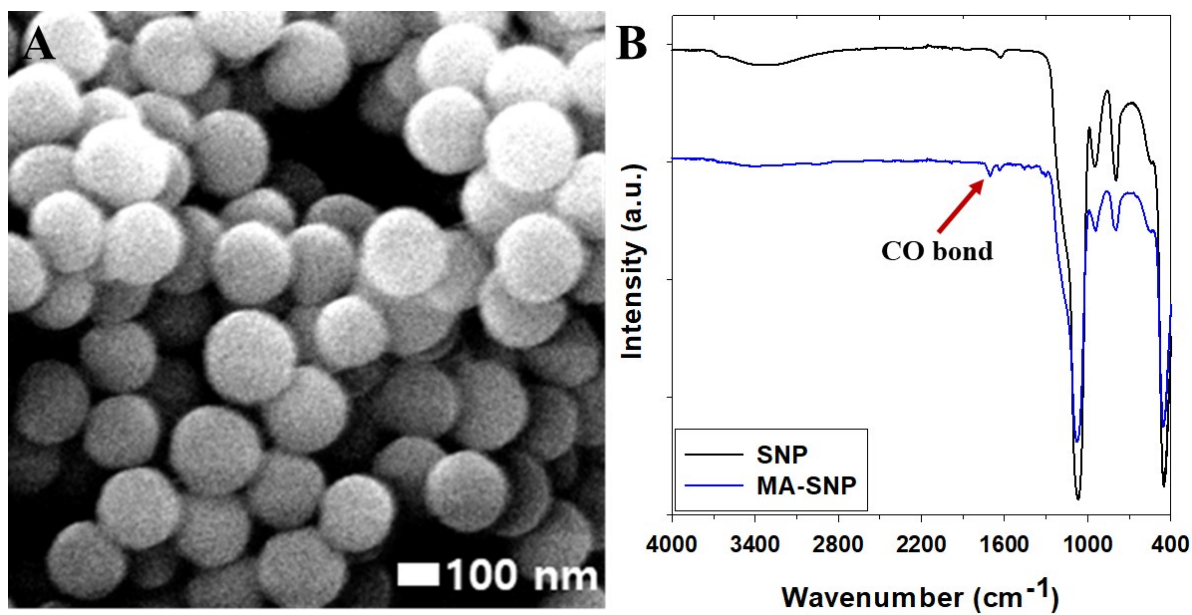

**Supporting figure 1.** A) SEM image of SNPs created by the Stöber process, and B) Comparative FT-IR data of unmodified SNPs (SNP) and modified SNPs (MA-SNP)

|                           | <b>Sample 1</b> | <b>Sample 2</b> | <b>Sample 3</b> |
|---------------------------|-----------------|-----------------|-----------------|
| <b>Avidin</b>             | <b>200 µl</b>   | <b>200 µl</b>   | <b>0 µl</b>     |
| <b>Fluorescein biotin</b> | <b>100 µl</b>   | <b>100 µl</b>   | <b>100 µl</b>   |
| <b>Elution buffer</b>     | <b>0 µl</b>     | <b>200 µl</b>   | <b>200 µl</b>   |
| <b>PBS</b>                | <b>200 µl</b>   | <b>0 µl</b>     | <b>200 µl</b>   |
| <b>Eluted ratio</b>       | <b>7 %</b>      | <b>77 %</b>     | <b>78 %</b>     |

**Supporting table 1.** Various types of samples used to verify avidin-biotin complex separation.

|                                             | AM:0.844 M        |                           |                   |                           | AM: 1.688 M       |                           |                   |                           |
|---------------------------------------------|-------------------|---------------------------|-------------------|---------------------------|-------------------|---------------------------|-------------------|---------------------------|
|                                             | PEGDAAm: 0.973 mM |                           | PEGDAAm: 1.946 mM |                           | PEGDAAm: 0.973 mM |                           | PEGDAAm: 1.946 mM |                           |
| Biotin Concentration $1.0 \times 10^{-6}$ M | Shrinkage         | -2.42 %<br>( $\pm 1.31$ ) | Shrinkage         | -1.15 %<br>( $\pm 1.23$ ) | Shrinkage         | -2.24 %<br>( $\pm 3.06$ ) | Shrinkage         | -1.45 %<br>( $\pm 2.86$ ) |
| Biotin Concentration $1.0 \times 10^{-5}$ M | Shrinkage         | -4.45 %<br>( $\pm 2.07$ ) | Shrinkage         | -0.31 %<br>( $\pm 3.00$ ) | Shrinkage         | -1.06 %<br>( $\pm 0.80$ ) | Shrinkage         | -2.41 %<br>( $\pm 0.84$ ) |
| Biotin Concentration $1.0 \times 10^{-4}$ M | Shrinkage         | -6.12 %<br>( $\pm 2.52$ ) | Shrinkage         | 2.40 %<br>( $\pm 0.97$ )  | Shrinkage         | -4.60 %<br>( $\pm 2.23$ ) | Shrinkage         | -1.02 %<br>( $\pm 2.85$ ) |

**Supporting table 2.** Results of various experimental conditions used to maximize the degree of volume change by changing the concentrations of the monomer, the linker, and the targeting moiety, compared to control samples
